# Supplementary material for: Integrated CO2 Capture and Hydrogenation to Produce Formate in Aqueous Amine Solutions Using Pd-Based Catalyst
Source: MDPI journal article supplement (doi:10.3390/catal12080925), 2022-08-21
Supplement: s1 [file s1]

# Supporting Information

## Integrated CO<sub>2</sub> capture and hydrogenation to produce formate in aqueous amine solutions using Pd based catalyst

Lichun Li,<sup>a,b\*</sup> Xiangcan Chen,<sup>b</sup> Chu Yao,<sup>b</sup> Meng Xu<sup>b,\*</sup>

<sup>a</sup> Research Center for Environmental and Energy Catalysis, Institute of Fundamental and Frontier Sciences, University of Electronic Science and Technology of China, Chengdu, 611731, China

<sup>b</sup> College of Chemical Engineering, Zhejiang University of Technology, 18 Chaowang Road, Hangzhou, 310014

**Corresponding Authors:** Dr. Meng Xu, email: xumeng@zjut.edu.cn; Dr Lichun Li, lichunli@zjut.edu.cn.

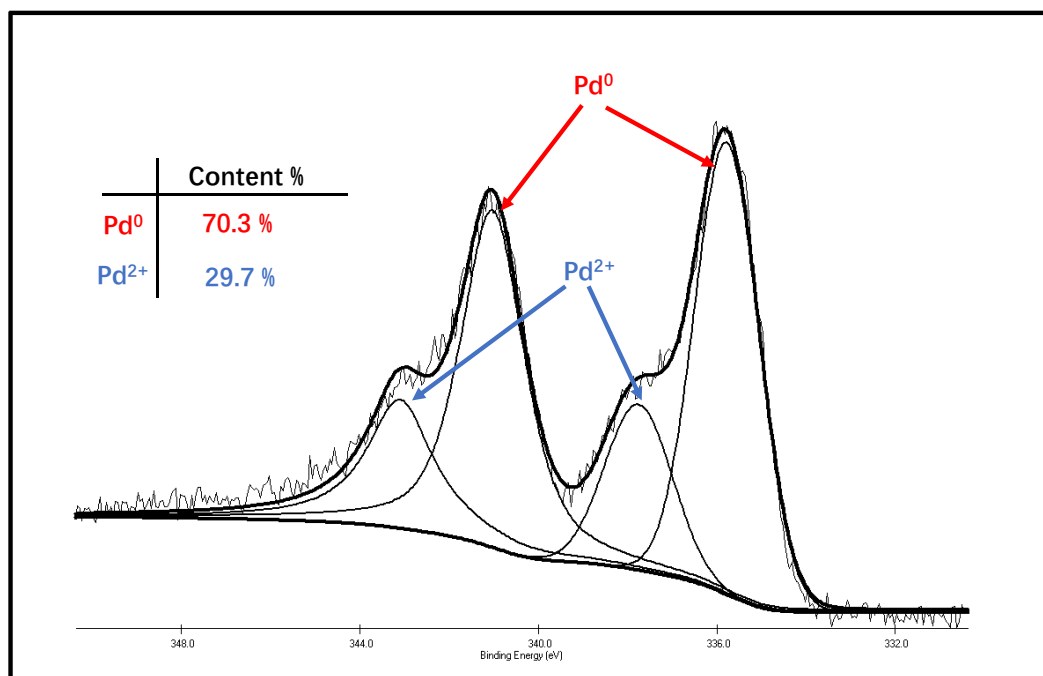

Figure S1. XPS spectra of Pd 3d core level of the used Pd/NAC catalyst
