# Supplementary material for: Integrated CO2 Capture and Hydrogenation to Produce Formate in Aqueous Amine Solutions Using Pd-Based Catalyst
Source: MDPI journal article supplement (doi:10.3390/catal12080925), 2022-08-21
Supplement: s1 [file s1]

Archive with 1 entries (1 files):
- catalysts-1838231-supplementary.pdf
